# Supplementary material
Source: PubMed Central journal article supplement (PMC7018442)
Supplement: NIHMS1061537-supplement-Supp_info.pdf [file NIHMS1061537-supplement-Supp_info.pdf]

# The Journal of Physiology Statistical Summary Document

**Manuscript Title:** Intracranial pressure modulates aqueous humor dynamics of the eye

**Authors:** Kayla R. Ficarrotta and Christopher L. Passaglia

**Animal model used, if applicable:** Retired-breeder Brown-Norway rat

**Underlying hypothesis:** The objective of this research was to test the hypothesis that IOP and ICP are physiologically connected and elucidate the mechanism underlying their putative relationship.

## Definitions of 'n':

Questions 1-3: n = number of animals from which IOP was held at different levels to measure C at resting ICP and at ICP elevated by 15mmHg

Question 4: n = subset number of animals from which IOP, ICP, and MAP were simultaneously recorded

Question 5: n = subset number of animals from which outflow facility data were obtained at resting ICP, elevated ICP, and again at resting ICP

Question 6: n = subset number of animals from which outflow facility data were obtained at resting ICP and elevated ICP after animal euthanasia

Question 7: n = subset number of animals from which outflow facility data were obtained at resting ICP and elevated ICP after corneal application of TTX

Question 8: n = number of animals from which outflow facility data were obtained at resting ICP after corneal application of TTX

## Statistical summary table:

| Experimental question number* | Finding/conclusion | Experiment location/variable | Mean value | SD     | n  | P**    | Units           | Data comparisons                    | Statistical test         | Any other variable | Figure/table | Comments              |
|-------------------------------|--------------------|------------------------------|------------|--------|----|--------|-----------------|-------------------------------------|--------------------------|--------------------|--------------|-----------------------|
| 1. Effect of high IOP on ICP? | ICP unaltered      | $\Delta$ ICP                 | 1.1        | 1.7    | 18 | 0.07   | mmHg            | resting v. max IOP                  | Students' t test, paired |                    | 2            | passed normality test |
| 2. Effect of high ICP on IOP? | IOP increased      | $\Delta$ IOP                 | 3.0        | 1.9    | 18 | <0.001 | mmHg            | resting ICP v. 15mmHg ICP elevation | Students' t test, paired |                    | 2            | passed normality test |
| 3. Effect of high ICP on C?   | C decreased        | C (rest)<br>C (highICP)      | 22<br>13   | 4<br>3 | 18 | <0.001 | nl/min/<br>mmHg | resting ICP v. 15mmHg ICP elevation | Students' t test, paired |                    | 3A           | passed normality test |

# The Journal of Physiology Statistical Summary Document

|                                            |                                |                             |      |     |    |                  |             |                                     |                                               |  |    |                       |
|--------------------------------------------|--------------------------------|-----------------------------|------|-----|----|------------------|-------------|-------------------------------------|-----------------------------------------------|--|----|-----------------------|
| 4. Effect of high IOP and high ICP on MAP? | MAP unaltered for both         | $\Delta$ MAP                | -0.3 | 0.7 | 7  | 0.27             | mmHg        | resting v. max IOP                  | Students' t test, paired                      |  | 2  | passed normality test |
|                                            |                                | $\Delta$ MAP                | 0.5  | 0.8 |    | 0.16             | mmHg        | resting ICP v. 15mmHg ICP elevation |                                               |  |    |                       |
| 5. Is ICP effect reversible?               | C returned to baseline         | C (pre)                     | 24   | 4   | 4  | <b>&lt;0.01</b>  | nl/min/mmHg | pre v. peri                         | 1-way ANOVA, Tukey multiple paired comparison |  | 3B | passed normality test |
|                                            |                                | C (peri)                    | 14   | 1   |    | <b>&lt;0.01</b>  |             | peri v. post                        |                                               |  |    |                       |
|                                            |                                | C (post)                    | 25   | 4   |    | 0.90             |             | pre v. post                         |                                               |  |    |                       |
| 6. Does ICP effect persist after death?    | C returned to baseline         | C (rest)                    | 22   | 3   | 10 | <b>&lt;0.001</b> | nl/min/mmHg | rest v. high                        | 1-way ANOVA, Tukey multiple paired comparison |  | 4  | passed normality test |
|                                            |                                | C (highICP)                 | 13   | 3   |    | <b>&lt;0.001</b> |             | high v. dead                        |                                               |  |    |                       |
|                                            |                                | C (highICP +dead)           | 19   | 4   |    | 0.07             |             | rest v. dead                        |                                               |  |    |                       |
| 7. Effect of ICP blocked by TTX?           | C and IOP returned to baseline | C (rest)                    | 23   | 2   | 4  | <b>0.01</b>      | nl/min/mmHg | rest v. high                        | 1-way ANOVA, Tukey multiple paired comparison |  | 5  | passed normality test |
|                                            |                                | C (highICP)                 | 13   | 3   |    | <b>0.03</b>      |             | high v. TTX                         |                                               |  |    |                       |
|                                            |                                | C (highICP +TTX)            | 21   | 6   |    | 0.63             |             | rest v. TTX                         |                                               |  |    |                       |
|                                            |                                | $\Delta$ IOP (highICP)      | 2.5  | 2.0 |    | <b>0.03</b>      | mmHg        | $\Delta$ IOP pre- v. post-TTX       | Students' t test, paired                      |  | 5  | passed normality test |
|                                            |                                | $\Delta$ IOP (highICP +TTX) | -0.1 | 1.2 |    |                  |             |                                     |                                               |  |    |                       |
| 8. Effect of TTX on C and IOP?             | C and IOP unaltered            | C (rest)                    | 25   | 2   | 3  | 0.46             | nl/min/mmHg | C before v. after TTX               | Students' t test, paired                      |  | 5  | passed normality test |
|                                            |                                | C (rest +TTX)               | 24   | 3   |    |                  |             | IOP pre- v. post-TTX                |                                               |  |    |                       |
|                                            |                                | $\Delta$ IOP                | -0.6 | 1.1 |    | 0.47             | mmHg        |                                     |                                               |  |    |                       |
